# Supplementary material
Source: publisher figshare collection journal article supplement (https://asha.figshare.com/articles/dataset/_/26142661)
Supplement: Supplementary file 1 [file 1]

### Supplemental Material S3. Coefficients of variation.

The coefficient of variation is a standardized measure of variability which facilitates comparisons of variance across variables which were measured on different scales. Coefficients of variation for the Bayley language scores (Table S3.1) and LSA measures (Table S3.2) were calculated by dividing the standard deviation for each measure by its corresponding mean.

**Table S3.1.** Coefficients of variation for the Bayley language scores.

|                          | Term | Preterm |
|--------------------------|------|---------|
| Receptive communication  | 0.22 | 0.39    |
| Expressive communication | 0.23 | 0.49    |
| Language composite       | 0.11 | 0.24    |

**Table S3.2.** Coefficients of variation for the LSA measures.

|                             | Mother-child conversation |         | Father-child conversation |         |
|-----------------------------|---------------------------|---------|---------------------------|---------|
|                             | Term                      | Preterm | Term                      | Preterm |
| <i>Linguistic</i>           |                           |         |                           |         |
| Types                       | 0.52                      | 0.61    | 0.48                      | 0.62    |
| Tokens                      | 0.58                      | 0.71    | 0.56                      | 0.66    |
| Type-token ratio            | 0.26                      | 0.13    | 0.25                      | 0.31    |
| % nouns                     | 0.51                      | 0.57    | 0.54                      | 0.50    |
| % verbs                     | 0.68                      | 0.56    | 0.77                      | 0.56    |
| % adjectives                | 1.08                      | 1.11    | 1.43                      | 1.16    |
| MLU (morphemes)             | 0.29                      | 0.33    | 0.30                      | 0.34    |
| MLU (words)                 | 0.28                      | 0.32    | 0.30                      | 0.33    |
| Verbs per utterance         | 0.84                      | 0.70    | 0.96                      | 0.81    |
| <i>Paralinguistic</i>       |                           |         |                           |         |
| Volubility (words per min)  | 0.55                      | 0.72    | 0.53                      | 0.60    |
| Speech rate (words per min) | 0.21                      | 0.18    | 0.19                      | 0.21    |
| Intelligibility             | 0.23                      | 0.08    | 0.15                      | 0.13    |
| Intelligible words per min  | 0.31                      | 0.20    | 0.12                      | 0.27    |

*Note.* The coefficients of variation for each LSA measure were calculated following the removal of outliers for the AN(C)OVA analyses.
