# Supplementary material
Source: publisher figshare collection journal article supplement (https://asha.figshare.com/articles/dataset/_/26142661)
Supplement: Supplementary file 2 [file 1]

**Supplemental Material S1.** Operationalization of the linguistic and paralinguistic features of child speech.

*LSA: Calculation of Linguistic and Paralinguistic Metrics*

| Calculation                    |                                                                                          |
|--------------------------------|------------------------------------------------------------------------------------------|
| <i>Linguistic</i>              |                                                                                          |
| Types                          | Total number of unique words                                                             |
| Tokens                         | Total number of intelligible words                                                       |
| Type-token ratio               | (Number of types / Number of tokens)                                                     |
| % nouns                        | (Number of nouns / Total number of intelligible words) × 100                             |
| % verbs                        | (Number of verbs / Total number of intelligible words) × 100                             |
| % adjectives                   | (Number of adjectives / Total number of intelligible words) × 100                        |
| MLU (morphemes)                | Mean length of utterance in morphemes                                                    |
| MLU (words)                    | Mean length of utterance in words                                                        |
| Verbs per utterance            | (Number of verbs / Number of utterances)                                                 |
| <i>Paralinguistic</i>          |                                                                                          |
| Volubility (words per minute)  | (Total number of intelligible and unintelligible words / Transcript duration in minutes) |
| Speech rate (words per minute) | (Total number of intelligible and unintelligible words / Child speaking time in minutes) |
| Intelligibility                | (Number of intelligible words / Total number of intelligible and unintelligible words)   |
| Intelligible words per minute  | (Number of intelligible words / Child speaking time in minutes)                          |
