# Supplementary material
Source: publisher figshare collection journal article supplement (https://asha.figshare.com/articles/dataset/_/26142661)
Supplement: Supplementary file 3 [file 1]

**Supplemental Material S2.** AN(C)OVAs investigating the effect of birth status and the language sampling context on the linguistic and paralinguistic features of child speech.

**Table S2.1.** Number of datapoints in each LSA AN(C)OVA, stratified according to Birth Status × Sampling Context Subgroup.

|                                | Term-born                 |                           | Preterm-born              |                           |
|--------------------------------|---------------------------|---------------------------|---------------------------|---------------------------|
|                                | Mother-child conversation | Father-child conversation | Mother-child conversation | Father-child conversation |
| <i>Linguistic</i>              |                           |                           |                           |                           |
| Types                          | 24                        | 24                        | 22                        | 17                        |
| Tokens                         | 24                        | 24                        | 21                        | 16                        |
| Type-token ratio               | 24                        | 23                        | 18                        | 17                        |
| % nouns                        | 21                        | 23                        | 22                        | 17                        |
| % verbs                        | 24                        | 24                        | 22                        | 17                        |
| % adjectives                   | 22                        | 18                        | 20                        | 15                        |
| MLU (morphemes)                | 24                        | 24                        | 22                        | 17                        |
| MLU (words)                    | 24                        | 24                        | 22                        | 17                        |
| Verbs per utterance            | 24                        | 24                        | 22                        | 17                        |
| <i>Paralinguistic</i>          |                           |                           |                           |                           |
| Volubility (words per minute)  | 24                        | 24                        | 22                        | 16                        |
| Speech rate (words per minute) | 24                        | 24                        | 22                        | 17                        |
| Intelligibility                | 24                        | 23                        | 20                        | 15                        |
| Intelligible words per minute  | 24                        | 21                        | 21                        | 17                        |

**Table S2.2.** AN(C)OVAs corresponding to the linguistic features of child speech.

|                                  | Main/Interaction effects        | Test statistic        | <i>p</i>         | $\eta_p^2$ |
|----------------------------------|---------------------------------|-----------------------|------------------|------------|
| Types <sup>a</sup>               | Child Age                       | $F(1, 41.82) = 16.07$ | <b>&lt; .001</b> | .28        |
|                                  | Birth Status                    | $F(1, 41.98) = 0.07$  | .794             | < .01      |
|                                  | Sampling Context                | $F(1, 38.93) = 1.95$  | .170             | .05        |
|                                  | Birth Status × Sampling Context | $F(1, 38.96) = 0.69$  | .410             | .02        |
| Tokens <sup>a</sup>              | Child Age                       | $F(1, 42.04) = 10.15$ | <b>.003</b>      | .19        |
|                                  | Birth Status                    | $F(1, 39.55) = 0.20$  | .657             | < .01      |
|                                  | Sampling Context                | $F(1, 36.50) = 0.51$  | .481             | .01        |
|                                  | Birth Status × Sampling Context | $F(1, 36.54) = 1.71$  | .200             | .04        |
| Type-token ratio                 | Birth Status                    | $F(1, 42.94) = 1.55$  | .220             | .03        |
|                                  | Sampling Context                | $F(1, 42.01) = 0.16$  | .692             | < .01      |
|                                  | Birth Status × Sampling Context | $F(1, 42.01) = 5.73$  | <b>.021</b>      | .12        |
| % nouns                          | Birth Status                    | $F(1, 43.48) = 1.57$  | .218             | .03        |
|                                  | Sampling Context                | $F(1, 38.82) = 1.08$  | .304             | .03        |
|                                  | Birth Status × Sampling Context | $F(1, 38.82) = 0.15$  | .703             | < .01      |
| % verbs <sup>a</sup>             | Child Age                       | $F(1, 42.41) = 5.60$  | <b>.023</b>      | .12        |
|                                  | Birth Status                    | $F(1, 42.60) = 0.04$  | .850             | < .01      |
|                                  | Sampling Context                | $F(1, 42.23) = 0.28$  | .602             | < .01      |
|                                  | Birth Status × Sampling Context | $F(1, 42.26) = 0.19$  | .663             | < .01      |
| % adjectives                     | Birth Status                    | $F(1, 40.68) = 1.90$  | .176             | .04        |
|                                  | Sampling Context                | $F(1, 30.49) = 6.34$  | <b>.017</b>      | .17        |
|                                  | Birth Status × Sampling Context | $F(1, 30.49) = 2.38$  | .133             | .07        |
| MLUm <sup>a</sup>                | Child Age                       | $F(1, 44.02) = 8.03$  | <b>.007</b>      | .15        |
|                                  | Birth Status                    | $F(1, 44.14) = 0.09$  | .766             | < .01      |
|                                  | Sampling Context                | $F(1, 39.98) = 2.62$  | .114             | .06        |
|                                  | Birth Status × Sampling Context | $F(1, 40.00) = 0.07$  | .798             | < .01      |
| MLUw <sup>a</sup>                | Child Age                       | $F(1, 43.85) = 7.95$  | <b>.007</b>      | .15        |
|                                  | Birth Status                    | $F(1, 43.99) = 0.09$  | .763             | < .01      |
|                                  | Sampling Context                | $F(1, 40.23) = 1.57$  | .218             | .04        |
|                                  | Birth Status*Sampling Context   | $F(1, 40.26) = 0.36$  | .553             | < .01      |
| Verbs per utterance <sup>a</sup> | Child Age                       | $F(1, 43.33) = 9.13$  | <b>.004</b>      | .17        |
|                                  | Birth Status                    | $F(1, 43.50) < 0.01$  | .950             | < .01      |
|                                  | Sampling Context                | $F(1, 41.01) = 0.02$  | .879             | < .01      |
|                                  | Birth Status*Sampling Context   | $F(1, 41.05) = 0.12$  | .730             | < .01      |

*Note.* Type III sums of squares. Statistically significant effects ( $p < .05$ ) are shown in bold. Sampling context = Language sampling context.

<sup>a</sup> ANCOVA controlling for child age.

**Table S2.3.** AN(C)OVAs corresponding to the paralinguistic features of child speech.

|                                         | Main/Interaction effect         | Test statistic        | <i>p</i>    | $\eta_p^2$ |
|-----------------------------------------|---------------------------------|-----------------------|-------------|------------|
| Volubilit <sup>a</sup>                  | Child Age                       | $F(1, 42.05) = 11.01$ | <b>.002</b> | .21        |
|                                         | Birth Status                    | $F(1, 41.02) = 1.46$  | .233        | .03        |
|                                         | Sampling Context                | $F(1, 38.74) = 1.10$  | .300        | .03        |
|                                         | Birth Status × Sampling Context | $F(1, 38.81) = 2.15$  | .151        | .05        |
| Speech rate                             | Birth Status                    | $F(1, 45.15) = 1.81$  | .185        | .04        |
|                                         | Sampling Context                | $F(1, 42.01) = 0.15$  | .699        | < .01      |
|                                         | Birth Status × Sampling Context | $F(1, 42.01) = 0.12$  | .723        | < .01      |
| Intelligibility <sup>a</sup>            | Child Age                       | $F(1, 39.60) = 2.43$  | .127        | .06        |
|                                         | Birth Status                    | $F(1, 40.02) = 11.79$ | <b>.001</b> | .23        |
|                                         | Sampling Context                | $F(1, 39.46) = 0.06$  | .808        | < .01      |
|                                         | Birth Status × Sampling Context | $F(1, 39.49) = 1.54$  | .222        | .04        |
| Intelligible words per min <sup>a</sup> | Child Age                       | $F(1, 41.96) = 6.20$  | <b>.017</b> | .13        |
|                                         | Birth Status                    | $F(1, 42.26) = 0.07$  | .798        | < .01      |
|                                         | Sampling Context                | $F(1, 39.11) = 2.24$  | .143        | .05        |
|                                         | Birth Status × Sampling Context | $F(1, 39.14) < 0.01$  | .971        | < .01      |

*Note.* Type III sums of squares. Statistically significant effects ( $p < .05$ ) are shown in bold. Sampling context = Language sampling context.

<sup>a</sup> ANCOVA controlling for child age.
